# Supplementary material for: Fluorescence identification of arthropathic calcium pyrophosphate single crystals using alizarin red S and a xanthene dipicolylamine ZnIIcomplex
Source: Royal Society of Chemistry journal article supplement (doi:10.1039/d2an01257j), 2022-01-01
Supplement: d2an01257j1.pdf [file d2an01257j1.pdf]

## Electronic supplementary information

### Fluorescence identification of arthropathic calcium pyrophosphate single crystals using alizarin red S and xanthene dipicolylamine $\text{Zn}^{\text{II}}$ complex

Waralee Srinarawat, Ruedee Hemstapat, Tulyapruet Tawonsawatruk, Nisa Patikarnmonthon, Itaru Hamachi, Akio Ojida and Jirarut Wongkongkeatp\*

#### *Synthesis of MSU crystal*

MSU crystals were prepared as described by Denko and Whitehouse (1976). Typically, 2.00 g of uric acid was weighed and added to 400 ml of deionized water under ambient air. The solution was continuously stirred and heated to 60°C for 30 minutes, then an appropriate volume of 2 M NaOH was added to adjust pH of the solution to 8.9 to obtain the clear solution. Then the solution was cooled down to room temperature and allowed to crystallize for 18 hours at room temperature. The obtained white powder was filtered through Whatman grade 1 filter paper and dried in hot-air oven at 180°C for 2 hours. The obtained MSU crystal was 1.84 g (yield 72.5%) and kept in a sealed glass vial stored inside a desiccator at room temperature.

Denko, C.W., & Whitehouse, M.W. (1976). Experimental inflammation induced by naturally occurring microcrystalline calcium salts. *The Journal of Rheumatology*, 3(1), 54-62.

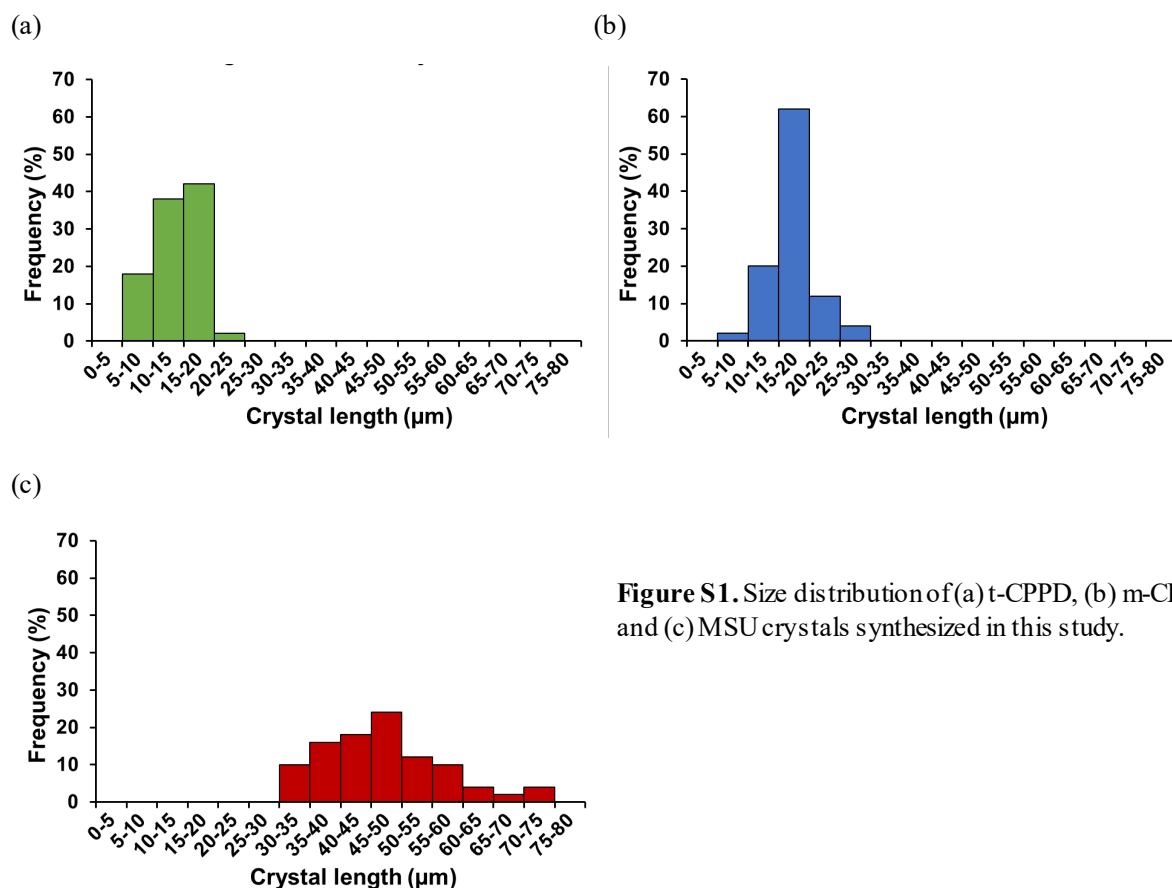

**Figure S1.** Size distribution of (a) t-CPPD, (b) m-CPPD and (c) MSU crystals synthesized in this study.

### Characterization of crystals

XRD measurements were performed with a Bruker AXS model D8 discover equipped with Cu radiation set at 40 mA current and 40 kV voltage. The crystals were scanned from 2-70° in the 2 $\theta$  range with a scanning rate of 0.0116° per minute at 25°C. FT-IR spectrums of the crystals were characterized by a PerkinElmer frontier FTIR with 4 cm<sup>-1</sup> resolutions and 16 scans per spectrum over the wavenumber range of 4000 - 400 cm<sup>-1</sup>. Raman spectroscopy was performed to characterize the crystal using a Horiba XploRA PLUS confocal Raman microscope over the wavenumber range of 50-3400 cm<sup>-1</sup> with laser source at 532 nm. TGA was performed with a PerkinElmer TGA 4000 in the temperature range of 30-500°C at a heating rate of 5°C per min.

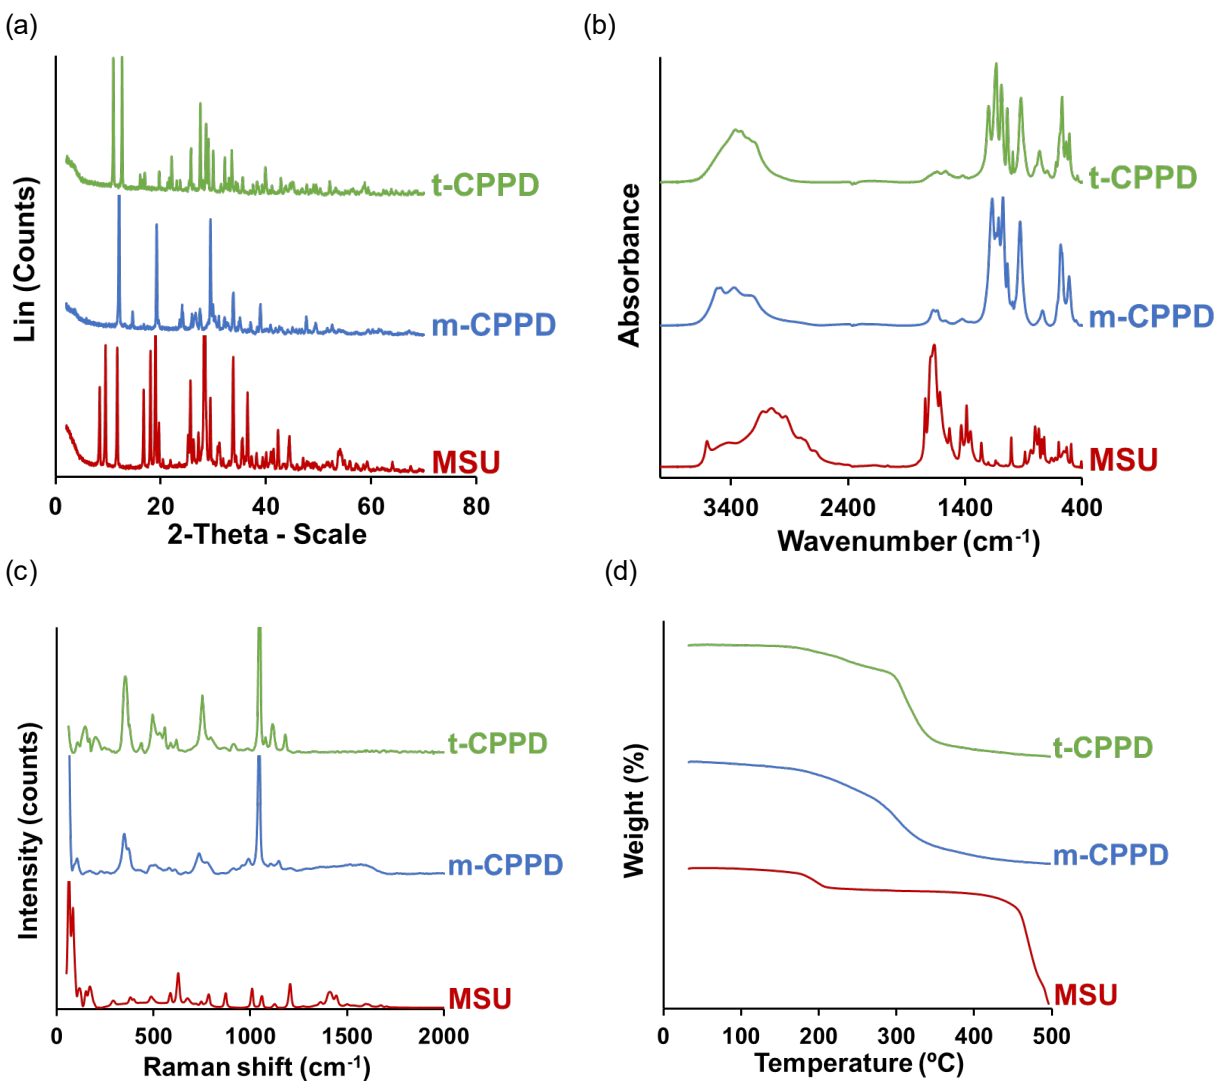

**Figure S2.** (a) XRD patterns, (b) FTIR, (c) Raman spectra and (d) TGA curves of t-CPPD (green), m-CPPD (blue) and MSU (red) crystals synthesized in this study.

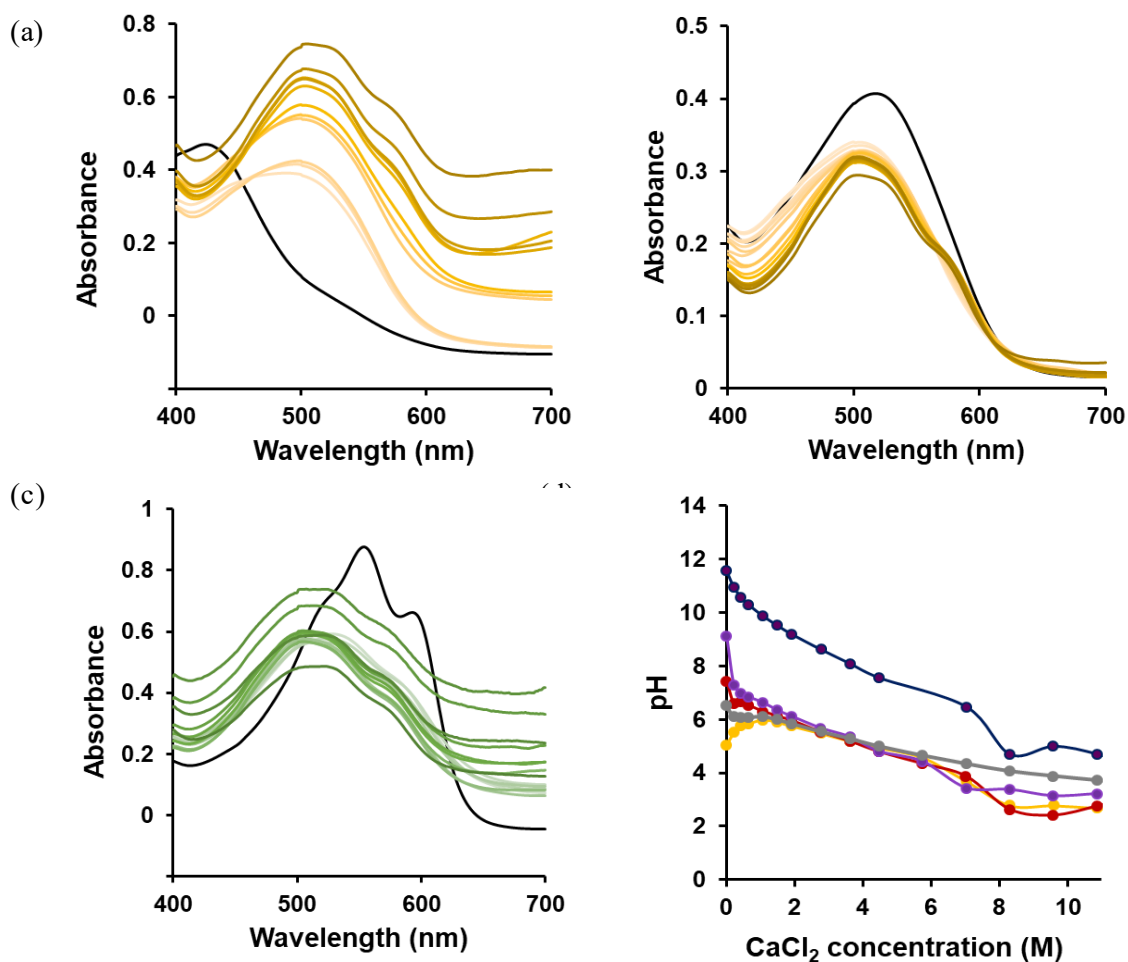

**Figure S3.** The UV-visible spectrum of the ARS solution (73  $\mu\text{M}$ ) upon addition with  $\text{CaCl}_2$  at initial pH of 5.0 (a), 7.5 (b) and 11.5 (c). Black line refers to ARS solution without addition of salts. Gradient line color from light to dark represents the concentration of  $\text{CaCl}_2$  from 0 to 11 M. (d) pH change of the ARS solution (73  $\mu\text{M}$ ) during addition of  $\text{CaCl}_2$  when the initial pH of the ARS solution was 5.0 (yellow), 7.4 (red), 9.0 (purple), 11.5 (indigo) and no ARS (gray).

### Fluorescent sensing mechanism of XDZ complex

The fluorescent quenching of XDZ complex in the aqueous solution is based on the unique mechanism in which the bridging oxygen from water molecule disrupts a system of conjugated double bonds of xanthene ring as previously described (Ojida et al., J. Am. Chem. Soc., 2008, 130, 12095-12101; Wongkongkatep et al., Top. Curr. Chem. (Z), 2017, 375, 30). The presence of inorganic pyrophosphate in the solution removes the bridging oxygen and restores the conjugated double bonds system of xanthene ring, thus turns on the fluorescent emission in relation to the concentration of pyrophosphate added as shown below.

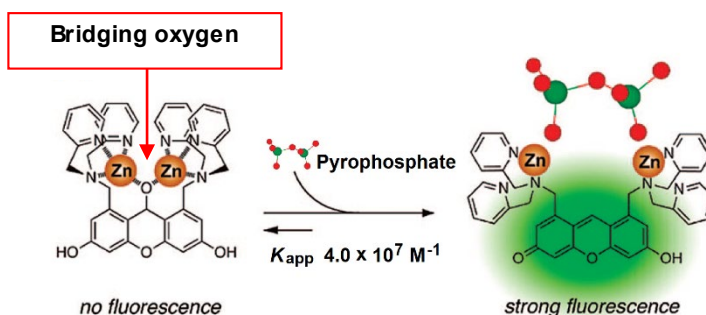

However, when the XDZ complex was used for staining the MSU crystals under dried condition, the bridging oxygen from water molecule of the quenched XDZ complex seemed to be removed during the drying process, resulting in the strong green fluorescence of XDZ complex at the surface of the MSU crystals due to the non-specific binding as shown in Figure S4.

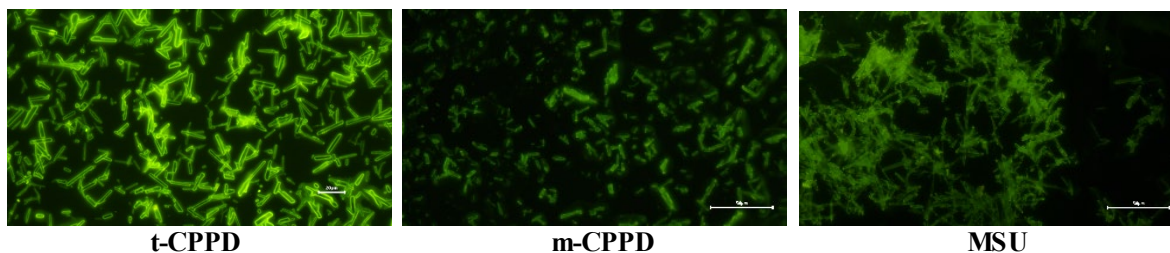

**Figure S4.** XDZ-staining of t-CPPD, m-CPPD and MSU using dried drop technique. Scale bars represent 20  $\mu\text{m}$  for t-CPPD and 50  $\mu\text{m}$  for m-CPPD and MSU.

**Table S1.** Microscopic images of MSU and calcium associated crystals/aggregates stained with ARS under red fluorescence channel. All images were acquired at exposure time 350 ms, gain 500%.

| Type of crystal | ARS pH 5                                                                           | ARS pH 7.4                                                                          | ARS pH 9                                                                             |
|-----------------|------------------------------------------------------------------------------------|-------------------------------------------------------------------------------------|--------------------------------------------------------------------------------------|
| m-CPPD          | 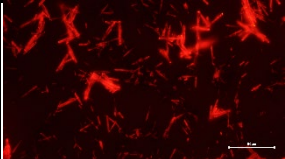  | 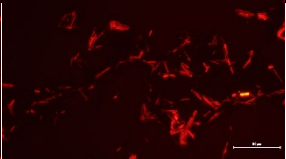  | 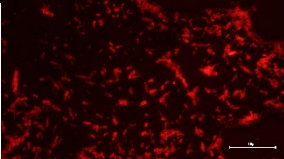  |
| t-CPPD          | 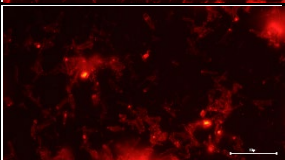  | 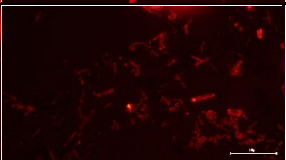  | 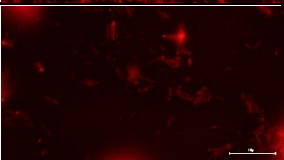  |
| Hydroxyapatite  | 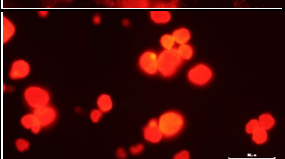  | 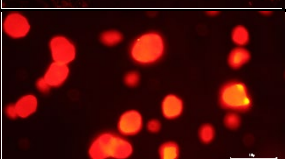  | 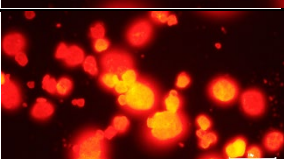  |
| Calcium oxalate | 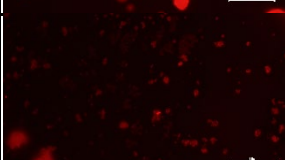  | 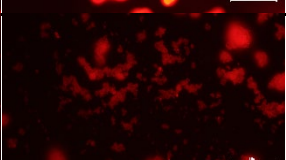  | 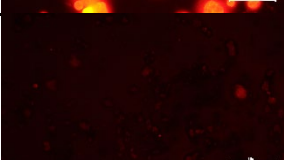  |
| MSU             | 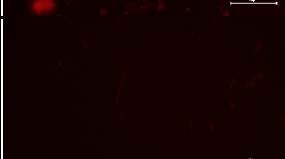 | 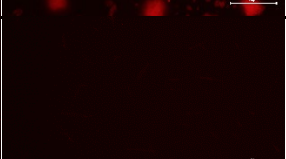 | 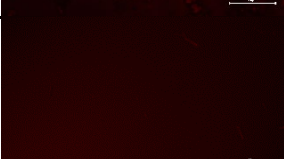 |

Scale bars represent 50  $\mu\text{m}$ .

**Table S2.** Heat map and values of fluorescence obtained from ARS/XDZ two-step method.

| Unknown sample No. | Red pixel values of ARS-stained unknown solid <sup>a</sup> | $F/F_0$ of XDZ and soaked solution <sup>a</sup> | Identification by 2-steps ARS/XDZ method <sup>b</sup> | Prepared compound <sup>c</sup> |
|--------------------|------------------------------------------------------------|-------------------------------------------------|-------------------------------------------------------|--------------------------------|
| 1                  | 29.8882                                                    | 1.207645                                        | negative                                              | MSU                            |
| 2                  | 255                                                        | 0.707139                                        | Other calcium-containing compound                     | HA                             |
| 3                  | 166.2758                                                   | 10.25313                                        | CPPD                                                  | m-CPPD                         |
| 4                  | 70.2704                                                    | 1.428873                                        | Other calcium-containing compound                     | CO                             |
| 5                  | 0                                                          | 39.08573                                        | Other pyrophosphate-containing compound               | NaPPi                          |
| 6                  | 0                                                          | 1.176221                                        | negative                                              | BSA                            |
| 7                  | 23.0652                                                    | 2.42822                                         | negative                                              | MSU                            |
| 8                  | 0                                                          | 1.335608                                        | negative                                              | BSA                            |
| 9                  | 255                                                        | 0.718928                                        | Other calcium-containing compound                     | HA                             |
| 10                 | 0                                                          | 0.723514                                        | negative                                              | HyA                            |
| 11                 | 0                                                          | 0.722283                                        | negative                                              | HyA                            |
| 12                 | 132.766                                                    | 21.80415                                        | CPPD                                                  | t-CPPD                         |
| 13                 | 88.8542                                                    | 5.908305                                        | CPPD                                                  | m-CPPD                         |
| 14                 | 77.1412                                                    | 1.309149                                        | Other calcium-containing compound                     | CO                             |
| 15                 | 0                                                          | 39.74467                                        | Other pyrophosphate-containing compound               | NaPPi                          |
| 16                 | 99.0648                                                    | 17.14383                                        | CPPD                                                  | t-CPPD                         |
| 17                 | 80.9664                                                    | 21.5608                                         | CPPD                                                  | t-CPPD                         |
| 18                 | 88.0286                                                    | 1.302058                                        | Other calcium-containing compound                     | CO                             |
| 19                 | 255                                                        | 0.708404                                        | Other calcium-containing compound                     | HA                             |
| 20                 | 61.4286                                                    | 17.42701                                        | CPPD                                                  | t-CPPD                         |
| 21                 | 0                                                          | 39.93765                                        | Other pyrophosphate-containing compound               | NaPPi                          |
| 22                 | 0                                                          | 0.736571                                        | negative                                              | HyA                            |
| 23                 | 248.522                                                    | 0.724501                                        | Other calcium-containing compound                     | HA                             |
| 24                 | 147.8572                                                   | 8.146295                                        | CPPD                                                  | m-CPPD                         |
| 25                 | 0                                                          | 40.46338                                        | Other pyrophosphate-containing compound               | NaPPi                          |
| 26                 | 30.537                                                     | 1.544191                                        | negative                                              | MSU                            |
| 27                 | 111.071                                                    | 1.243405                                        | Other calcium-containing compound                     | CO                             |
| 28                 | 126.8628                                                   | 21.61589                                        | CPPD                                                  | t-CPPD                         |
| 29                 | 23.6236                                                    | 1.278182                                        | negative                                              | MSU                            |
| 30                 | 250.0526                                                   | 0.713783                                        | Other calcium-containing compound                     | HA                             |
| 31                 | 0                                                          | 0.760937                                        | negative                                              | HyA                            |
| 32                 | 0                                                          | 1.243893                                        | negative                                              | BSA                            |
| 33                 | 0                                                          | 1.130504                                        | negative                                              | BSA                            |
| 34                 | 96.256                                                     | 1.224595                                        | Other calcium-containing compound                     | CO                             |
| 35                 | 132.5602                                                   | 5.352301                                        | CPPD                                                  | m-CPPD                         |
| 36                 | 159.735                                                    | 10.30149                                        | CPPD                                                  | m-CPPD                         |
| 37                 | 24.56066667                                                | 1.248632                                        | negative                                              | MSU                            |
| 38                 | 0                                                          | 41.57253                                        | Other pyrophosphate-containing compound               | NaPPi                          |
| 39                 | 0                                                          | 1.241871                                        | negative                                              | BSA                            |
| 40                 | 0                                                          | 0.729137                                        | negative                                              | HyA                            |

<sup>a</sup>Colorscale:

ARS      0 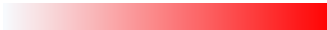 255

XDZ      0.7 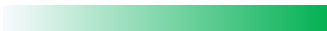 42

<sup>b</sup>Criteria for CPPD identification: ARS>50 and XDZ>3.

<sup>c</sup>BSA: bovine serum albumin; m-CPPD: monoclinic calcium pyrophosphate dihydrate; t-CPPD: triclinic calcium pyrophosphate dihydrate; CO: calcium oxalate; HA: hydroxyapatite; HyA: hyaluronic acid; MSU: monosodium urate; NaPPi: sodium pyrophosphate.
